# Supplementary material
Source: PubMed Central journal article supplement (PMC7045287)
Supplement: NIHMS1065203-supplement-Supplemental_Data_File_1.pdf [file NIHMS1065203-supplement-Supplemental_Data_File_1.pdf]

Prx3 Cys229 - unmodified: FQFVETHGEVCPANWTPESPTIKPSPTASK

Precursor mass: 1026.03777 Da (+4)

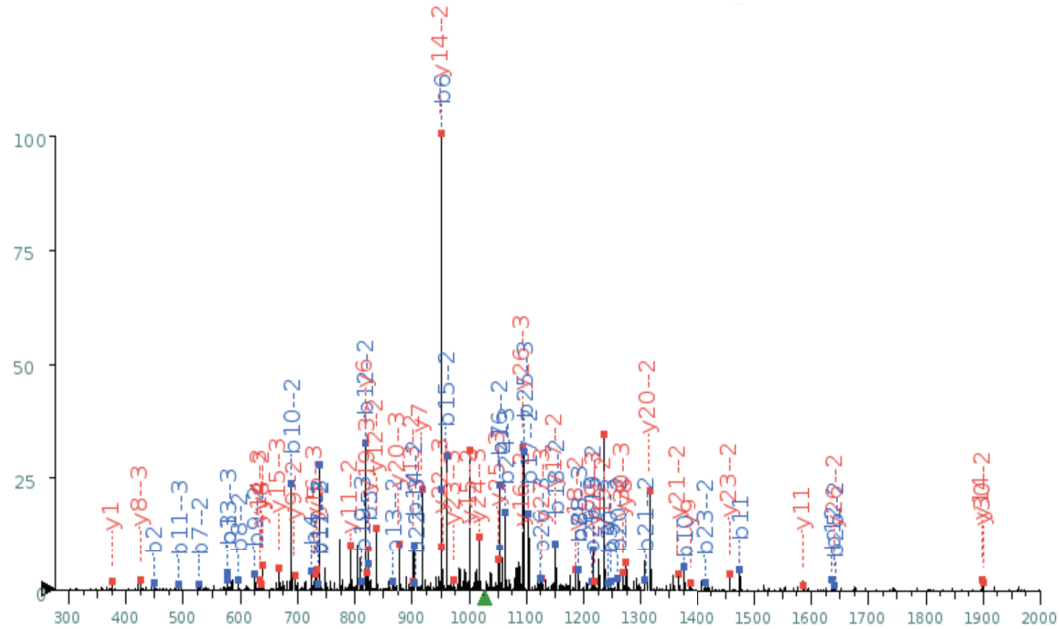

| +1    |            |          |          |            |    | +2    |            |          |          |            |    | +3    |            |          |          |            |    |
|-------|------------|----------|----------|------------|----|-------|------------|----------|----------|------------|----|-------|------------|----------|----------|------------|----|
| Seq # | b: Δ Error | b        | y        | y: Δ Error | +1 | Seq # | b: Δ Error | b        | y        | y: Δ Error | +1 | Seq # | b: Δ Error | b        | y        | y: Δ Error | +1 |
| A 1   | ---        | 301.207  | ---      | ---        | 31 | A 1   | ---        | 151.107  | ---      | ---        | 31 | A 1   | ---        | 101.074  | ---      | ---        | 31 |
| F 2   | -199.665   | 448.276  | 3800.936 | ---        | 30 | F 2   | ---        | 224.642  | 1900.972 | -293.413   | 30 | F 2   | ---        | 150.097  | 1267.650 | 579.580    | 30 |
| Q 3   | 448.149    | 576.334  | 3653.867 | ---        | 29 | Q 3   | ---        | 288.671  | 1827.437 | ---        | 29 | Q 3   | ---        | 192.783  | 1218.627 | 492.496    | 29 |
| F 4   | 440.206    | 723.403  | 3525.809 | ---        | 28 | F 4   | ---        | 362.205  | 1763.408 | ---        | 28 | F 4   | ---        | 241.806  | 1175.941 | ---        | 28 |
| V 5   | 442.154    | 822.471  | 3378.740 | ---        | 27 | V 5   | ---        | 411.739  | 1689.874 | ---        | 27 | V 5   | ---        | 274.829  | 1126.918 | -606.419   | 27 |
| E 6   | -621.763   | 951.514  | 3279.672 | ---        | 26 | E 6   | ---        | 476.261  | 1640.340 | 551.331    | 26 | E 6   | ---        | 317.843  | 1093.896 | -168.653   | 26 |
| T 7   | 461.123    | 1052.561 | 3150.629 | ---        | 25 | T 7   | 1727.469   | 526.784  | 1575.818 | ---        | 25 | T 7   | ---        | 351.525  | 1050.881 | 554.963    | 25 |
| H 8   | 378.632    | 1189.620 | 3049.582 | ---        | 24 | H 8   | 1442.784   | 595.314  | 1525.295 | ---        | 24 | H 8   | ---        | 397.212  | 1017.199 | 770.178    | 24 |
| G 9   | 132.807    | 1246.642 | 2912.523 | ---        | 23 | G 9   | 97.426     | 623.825  | 1456.765 | 554.230    | 23 | G 9   | ---        | 416.219  | 971.512  | 883.161    | 23 |
| E 10  | 266.181    | 1375.684 | 2855.501 | ---        | 22 | E 10  | 478.403    | 688.346  | 1428.254 | ---        | 22 | E 10  | ---        | 459.233  | 952.505  | -777.932   | 22 |
| V 11  | 298.566    | 1474.753 | 2726.459 | ---        | 21 | V 11  | 594.174    | 737.880  | 1363.733 | 417.946    | 21 | V 11  | 229.672    | 492.256  | 909.491  | ---        | 21 |
| C 12  | 294.043    | 1634.783 | 2627.390 | ---        | 20 | C 12  | 455.333    | 817.895  | 1314.199 | 583.014    | 20 | C 12  | ---        | 545.599  | 876.468  | 711.287    | 20 |
| P 13  | ---        | 1731.836 | 2467.360 | ---        | 19 | P 13  | -493.910   | 866.422  | 1234.183 | 544.179    | 19 | P 13  | -769.082   | 577.950  | 823.125  | 907.084    | 19 |
| A 14  | ---        | 1802.873 | 2370.307 | ---        | 18 | A 14  | 972.578    | 901.940  | 1185.657 | 793.571    | 18 | A 14  | ---        | 601.629  | 790.774  | ---        | 18 |
| N 15  | ---        | 1916.916 | 2299.270 | ---        | 17 | N 15  | 538.704    | 958.962  | 1150.139 | 594.855    | 17 | N 15  | ---        | 639.644  | 767.095  | ---        | 17 |
| W 16  | ---        | 2102.996 | 2185.227 | ---        | 16 | W 16  | 197.267    | 1052.001 | 1093.117 | 543.083    | 16 | W 16  | ---        | 701.670  | 729.080  | 1001.937   | 16 |
| T 17  | ---        | 2204.043 | 1999.148 | ---        | 15 | T 17  | 525.316    | 1102.525 | 1000.077 | 561.496    | 15 | T 17  | 434.161    | 735.353  | 667.054  | 586.310    | 15 |
| P 18  | ---        | 2301.096 | 1898.100 | 188.309    | 14 | P 18  | -198.571   | 1151.052 | 949.554  | 550.558    | 14 | P 18  | ---        | 767.704  | 633.371  | 852.936    | 14 |
| E 19  | ---        | 2430.139 | 1801.047 | ---        | 13 | E 19  | 562.299    | 1215.573 | 901.027  | 65.720     | 13 | E 19  | -364.745   | 810.718  | 601.021  | ---        | 13 |
| S 20  | ---        | 2517.171 | 1672.005 | ---        | 12 | S 20  | 730.219    | 1259.089 | 836.506  | 604.304    | 12 | S 20  | ---        | 839.728  | 558.006  | ---        | 12 |
| P 21  | ---        | 2614.223 | 1584.973 | 356.321    | 11 | P 21  | -252.006   | 1307.615 | 792.990  | 594.578    | 11 | P 21  | ---        | 872.079  | 528.996  | ---        | 11 |
| T 22  | ---        | 2715.271 | 1487.920 | ---        | 10 | T 22  | ---        | 1358.139 | 744.464  | ---        | 10 | T 22  | -1005.493  | 905.762  | 496.645  | ---        | 10 |
| I 23  | ---        | 2828.355 | 1386.872 | -105.899   | 9  | I 23  | 388.455    | 1414.681 | 693.940  | 758.066    | 9  | I 23  | ---        | 943.457  | 462.962  | ---        | 9  |
| K 24  | ---        | 3185.613 | 1273.788 | 358.729    | 8  | K 24  | ---        | 1593.310 | 637.398  | 770.538    | 8  | K 24  | 557.758    | 1062.543 | 425.268  | 1.643      | 8  |
| P 25  | ---        | 3282.666 | 916.530  | 278.459    | 7  | P 25  | -360.718   | 1641.837 | 458.769  | ---        | 7  | P 25  | -417.832   | 1094.893 | 306.182  | ---        | 7  |
| S 26  | ---        | 3369.698 | 819.477  | 482.335    | 6  | S 26  | ---        | 1685.353 | 410.242  | ---        | 6  | S 26  | 662.578    | 1123.904 | 273.831  | ---        | 6  |
| P 27  | ---        | 3466.751 | 732.445  | 269.824    | 5  | P 27  | ---        | 1733.879 | 366.726  | ---        | 5  | P 27  | ---        | 1156.255 | 244.820  | ---        | 5  |
| T 28  | ---        | 3567.798 | 635.393  | 173.101    | 4  | T 28  | ---        | 1784.403 | 318.200  | ---        | 4  | T 28  | 112.026    | 1189.938 | 212.469  | ---        | 4  |
| A 29  | ---        | 3638.835 | 534.345  | ---        | 3  | A 29  | ---        | 1819.921 | 267.676  | ---        | 3  | A 29  | 42.592     | 1213.617 | 178.786  | ---        | 3  |
| S 30  | ---        | 3725.867 | 463.308  | ---        | 2  | S 30  | ---        | 1863.437 | 232.158  | ---        | 2  | S 30  | -439.207   | 1242.627 | 155.107  | ---        | 2  |
| K 31  | ---        | ---      | 376.276  | 594.114    | 1  | K 31  | ---        | ---      | 188.642  | ---        | 1  | K 31  | ---        | ---      | 126.097  | ---        | 1  |

Prx3 Cys229 - SO<sub>3</sub>: FQFVETHGEVCPANWTPESPITKPPSPTASK  
 Precursor mass: 1023.7817 Da (+4)

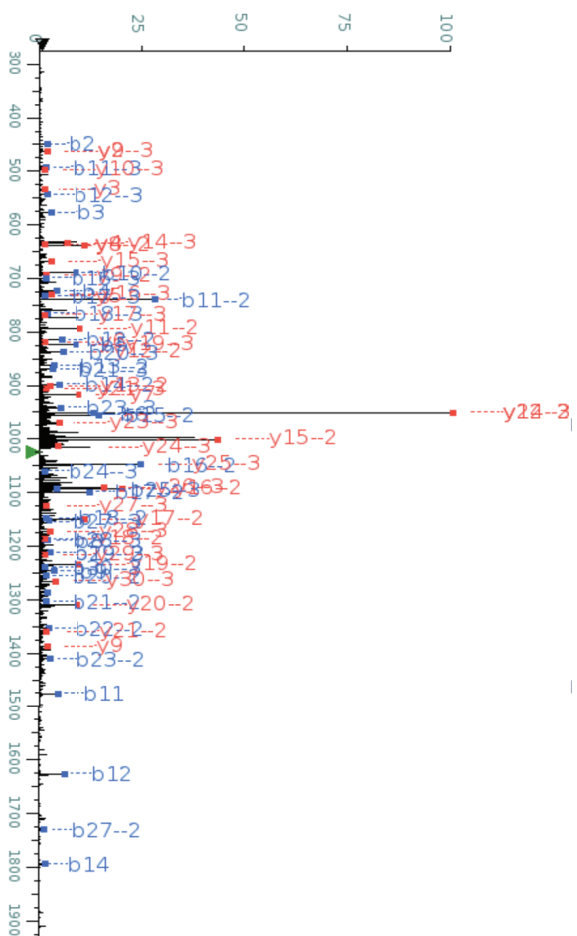

| Seq # | b: Δ     |          | Y        | Y: Δ     |     | Seq # | b: Δ  |          | Y        | Y: Δ     |     | Seq # | b: Δ  |          | Y        | Y: Δ     |     |
|-------|----------|----------|----------|----------|-----|-------|-------|----------|----------|----------|-----|-------|-------|----------|----------|----------|-----|
|       | Error    | b        |          | Error    | +1  |       | Error | b        |          | Error    | +1  |       | Error | b        |          | Error    | +1  |
| A 1   | ---      | 301.207  | ---      | ---      | --- | A 1   | ---   | 151.107  | ---      | ---      | --- | A 1   | ---   | 101.074  | ---      | ---      | --- |
| F 2   | -13.092  | 448.276  | 3791.899 | ---      | --- | F 2   | ---   | 224.642  | 1896.453 | ---      | --- | F 2   | ---   | 150.097  | 1264.638 | 747.946  | 30  |
| Q 3   | 302.642  | 576.334  | 3644.831 | ---      | --- | Q 3   | ---   | 288.671  | 1822.919 | ---      | --- | Q 3   | ---   | 192.783  | 1215.615 | 256.029  | 29  |
| F 4   | 8.835    | 723.403  | 3516.772 | ---      | --- | F 4   | ---   | 362.205  | 1758.890 | ---      | --- | F 4   | ---   | 241.806  | 1172.929 | 136.792  | 28  |
| V 5   | 705.370  | 822.471  | 3369.704 | ---      | --- | V 5   | ---   | 411.739  | 1685.355 | ---      | --- | V 5   | ---   | 274.829  | 1123.906 | 53.367   | 27  |
| E 6   | -598.964 | 951.514  | 3270.635 | ---      | --- | E 6   | ---   | 476.261  | 1635.821 | ---      | --- | E 6   | ---   | 317.843  | 1090.883 | -836.910 | 26  |
| T 7   | ---      | 1052.561 | 3141.593 | ---      | --- | T 7   | ---   | 526.784  | 1571.300 | ---      | --- | T 7   | ---   | 351.525  | 1047.869 | 244.869  | 25  |
| H 8   | -384.094 | 1189.620 | 3040.545 | ---      | --- | H 8   | ---   | 595.314  | 1520.776 | ---      | --- | H 8   | ---   | 397.212  | 1014.187 | -292.684 | 24  |
| G 9   | -52.637  | 1246.642 | 2903.486 | ---      | --- | G 9   | ---   | 623.825  | 1452.247 | ---      | --- | G 9   | ---   | 416.219  | 968.500  | 422.276  | 23  |
| E 10  | ---      | 1375.684 | 2846.455 | ---      | --- | E 10  | ---   | 688.346  | 1423.736 | ---      | --- | E 10  | ---   | 459.233  | 949.493  | 557.442  | 22  |
| V 11  | 278.960  | 1474.753 | 2717.422 | ---      | --- | V 11  | ---   | 737.880  | 1359.215 | 433.190  | 21  | V 11  | ---   | 492.256  | 906.479  | 146.177  | 21  |
| C# 12 | 331.231  | 1625.747 | 2618.354 | ---      | --- | C# 12 | ---   | 506.051  | 813.377  | 536.556  | 20  | C# 12 | ---   | 542.587  | 873.456  | ---      | 20  |
| P 13  | ---      | 1722.799 | 2467.360 | ---      | --- | P 13  | ---   | 521.841  | 861.903  | 521.841  | 19  | P 13  | ---   | 574.938  | 823.125  | -88.758  | 19  |
| A 14  | 371.044  | 1793.837 | 2370.307 | ---      | --- | A 14  | ---   | 957.839  | 897.422  | 1185.657 | 18  | A 14  | ---   | 598.617  | 790.774  | ---      | 18  |
| N 15  | ---      | 1907.880 | 2299.270 | ---      | --- | N 15  | ---   | 417.428  | 954.443  | 1150.139 | 17  | N 15  | ---   | 636.631  | 767.095  | 901.707  | 17  |
| W 16  | ---      | 2093.959 | 2185.227 | ---      | --- | W 16  | ---   | 613.165  | 1047.483 | 1093.117 | 16  | W 16  | ---   | 1272.763 | 698.658  | 729.080  | 16  |
| P 17  | ---      | 2195.007 | 1999.148 | ---      | --- | P 17  | ---   | 497.757  | 1098.007 | 1000.077 | 15  | P 17  | ---   | 480.704  | 732.340  | 667.054  | 15  |
| P 18  | ---      | 2292.059 | 1898.100 | ---      | --- | P 18  | ---   | 304.342  | 1146.533 | 949.554  | 14  | P 18  | ---   | 696.800  | 764.691  | 633.371  | 14  |
| E 19  | ---      | 2421.102 | 1801.047 | ---      | --- | E 19  | ---   | 451.256  | 1211.055 | 901.027  | 13  | E 19  | ---   | 807.705  | 601.021  | ---      | 13  |
| S 20  | ---      | 2508.134 | 1672.005 | ---      | --- | S 20  | ---   | 56.890   | 1254.571 | 836.506  | 12  | S 20  | ---   | -94.506  | 836.716  | 558.006  | 12  |
| P 21  | ---      | 2605.187 | 1584.973 | ---      | --- | P 21  | ---   | 341.393  | 1303.097 | 792.990  | 11  | P 21  | ---   | 924.789  | 869.067  | -709.592 | 11  |
| T 22  | ---      | 2706.234 | 1487.920 | ---      | --- | T 22  | ---   | -419.668 | 1353.621 | 744.464  | 10  | T 22  | ---   | 902.750  | 528.996  | ---      | 10  |
| I 23  | ---      | 2819.318 | 1386.872 | -572.273 | 9   | I 23  | ---   | 531.569  | 1410.163 | 693.940  | 9   | I 23  | ---   | 903.649  | 940.444  | 462.962  | 9   |
| K 24  | ---      | 3176.576 | 1273.788 | ---      | 8   | K 24  | ---   | 1588.792 | 1588.792 | 637.398  | 8   | K 24  | ---   | 438.752  | 1059.530 | 425.268  | 8   |
| P 25  | ---      | 3273.629 | 916.530  | 286.845  | 7   | P 25  | ---   | 1637.318 | 458.769  | 458.769  | 7   | P 25  | ---   | 169.027  | 1091.881 | 306.182  | 7   |
| S 26  | ---      | 3360.661 | 819.477  | 499.300  | 6   | S 26  | ---   | 1680.834 | 410.242  | 410.242  | 6   | S 26  | ---   | -761.327 | 1153.243 | 273.831  | 6   |
| P 27  | ---      | 3457.714 | 732.445  | 337.447  | 5   | P 27  | ---   | -58.293  | 1729.361 | 366.726  | 5   | P 27  | ---   | 1120.892 | 273.831  | ---      | 5   |
| T 28  | ---      | 3558.762 | 635.393  | 374.907  | 4   | T 28  | ---   | 1779.884 | 318.200  | 318.200  | 4   | T 28  | ---   | 833.838  | 1186.925 | 212.469  | 4   |
| A 29  | ---      | 3629.799 | 534.345  | 233.249  | 3   | A 29  | ---   | 1815.403 | 267.676  | 267.676  | 3   | A 29  | ---   | 822.809  | 1210.604 | 178.786  | 3   |
| S 30  | ---      | 3716.831 | 463.308  | 193.167  | 2   | S 30  | ---   | 1858.919 | 188.642  | 188.642  | 2   | S 30  | ---   | -750.812 | 1239.615 | 155.107  | 2   |
| K 31  | ---      | ---      | 376.276  | ---      | 1   | K 31  | ---   | ---      | ---      | ---      | 1   | K 31  | ---   | ---      | ---      | ---      | 1   |

Prx1 Cys173 - unmodified: HGEVCPAGWKPGSDTIKPDVNIK  
 Precursor mass: 827.96049 Da (+4)

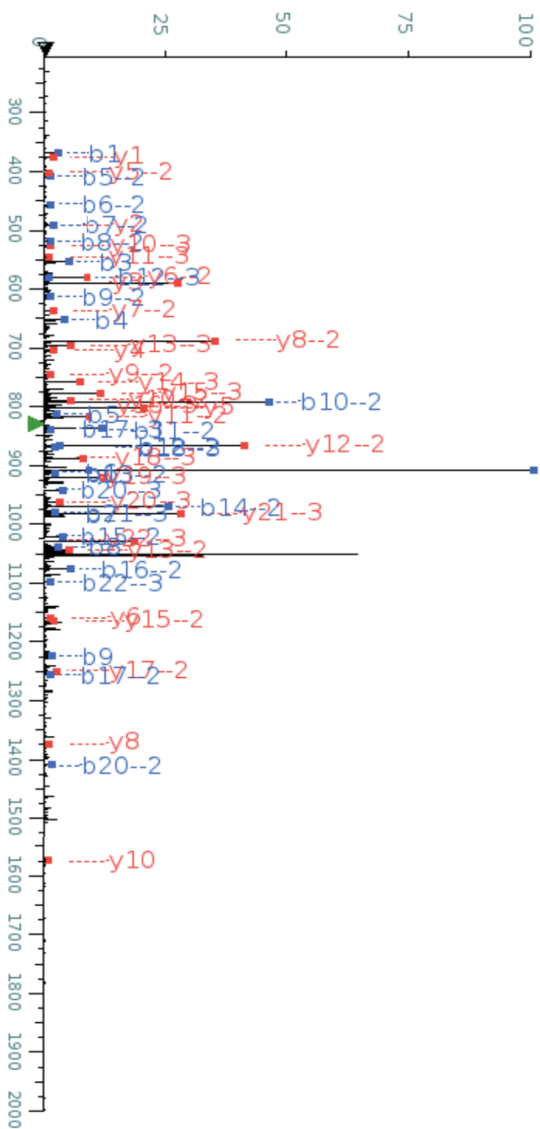

| +1    |            |          |          | +2    |            |          |          | +3    |            |         |         |       |            |         |         |            |    |
|-------|------------|----------|----------|-------|------------|----------|----------|-------|------------|---------|---------|-------|------------|---------|---------|------------|----|
| Seq # | b: Δ Error | b        | Y        | Seq # | b: Δ Error | b        | Y        | Seq # | b: Δ Error | b       | Y       | Seq # | b: Δ Error | b       | Y       | Y: Δ Error | +1 |
| H 1   | 279.661    | 367.229  | ---      | H 1   | ---        | 184.118  | ---      | H 1   | ---        | 123.081 | ---     | H 1   | ---        | 123.081 | ---     | ---        | 22 |
| G 2   | ---        | 424.251  | 2942.601 | G 2   | ---        | 212.629  | 1471.804 | G 2   | ---        | 142.088 | 981.539 | G 2   | ---        | 142.088 | 981.539 | ---        | 21 |
| E 3   | 341.035    | 553.293  | 2885.580 | E 3   | ---        | 277.150  | 1443.294 | E 3   | ---        | 185.103 | 962.531 | E 3   | ---        | 185.103 | 962.531 | ---        | 20 |
| V 4   | 316.293    | 652.362  | 2756.537 | V 4   | ---        | 326.684  | 1378.772 | V 4   | ---        | 218.125 | 919.517 | V 4   | ---        | 218.125 | 919.517 | ---        | 19 |
| C 5   | -133.332   | 812.392  | 2657.469 | C 5   | ---        | 406.700  | 1329.238 | C 5   | ---        | 271.469 | 886.494 | C 5   | ---        | 271.469 | 886.494 | ---        | 18 |
| P 6   | -647.849   | 909.445  | 2497.438 | P 6   | ---        | 931.357  | 455.226  | P 6   | ---        | 303.820 | 833.151 | P 6   | ---        | 303.820 | 833.151 | ---        | 17 |
| A 7   | -127.442   | 980.482  | 2400.385 | A 7   | ---        | -667.530 | 490.745  | A 7   | ---        | 327.499 | 800.800 | A 7   | ---        | 327.499 | 800.800 | ---        | 16 |
| G 8   | 291.079    | 1037.504 | 2329.348 | G 8   | ---        | 1405.789 | 519.255  | G 8   | ---        | 346.506 | 777.121 | G 8   | ---        | 346.506 | 777.121 | ---        | 15 |
| W 9   | 505.445    | 1223.583 | 2272.327 | W 9   | ---        | 49.772   | 612.295  | W 9   | ---        | 408.532 | 758.114 | W 9   | ---        | 408.532 | 758.114 | ---        | 14 |
| K 10  | ---        | 1580.841 | 2086.248 | K 10  | ---        | 571.087  | 790.924  | K 10  | ---        | 527.618 | 696.087 | K 10  | ---        | 527.618 | 696.087 | ---        | 13 |
| P 11  | ---        | 1677.894 | 1728.990 | P 11  | ---        | -168.827 | 839.450  | P 11  | ---        | 559.969 | 577.001 | P 11  | ---        | 559.969 | 577.001 | ---        | 12 |
| G 12  | ---        | 1734.915 | 1631.937 | G 12  | ---        | -942.715 | 867.961  | G 12  | ---        | 717.707 | 544.650 | G 12  | ---        | 717.707 | 544.650 | ---        | 11 |
| S 13  | ---        | 1821.947 | 1574.915 | S 13  | ---        | 478.034  | 911.477  | S 13  | ---        | 607.987 | 525.643 | S 13  | ---        | 607.987 | 525.643 | ---        | 10 |
| D 14  | ---        | 1936.974 | 1487.883 | D 14  | ---        | 570.192  | 968.991  | D 14  | ---        | 646.330 | 496.633 | D 14  | ---        | 646.330 | 496.633 | ---        | 9  |
| T 15  | ---        | 2038.022 | 1372.856 | T 15  | ---        | 862.590  | 1019.514 | T 15  | ---        | 680.012 | 458.290 | T 15  | ---        | 680.012 | 458.290 | ---        | 8  |
| I 16  | ---        | 2151.106 | 1271.809 | I 16  | ---        | 647.351  | 1076.057 | I 16  | ---        | 717.707 | 424.608 | I 16  | ---        | 717.707 | 424.608 | ---        | 7  |
| K 17  | ---        | 2508.364 | 1158.725 | K 17  | ---        | 344.370  | 1254.685 | K 17  | ---        | 806.495 | 836.793 | K 17  | ---        | 806.495 | 836.793 | ---        | 6  |
| P 18  | ---        | 2605.416 | 801.467  | P 18  | ---        | 647.351  | 1076.057 | P 18  | ---        | 378.541 | 869.144 | P 18  | ---        | 378.541 | 869.144 | ---        | 5  |
| D 19  | ---        | 2720.443 | 704.414  | D 19  | ---        | ---      | 1303.212 | D 19  | ---        | 674.541 | 907.486 | D 19  | ---        | 674.541 | 907.486 | ---        | 4  |
| V 20  | ---        | 2819.512 | 589.387  | V 20  | ---        | -558.262 | 1410.260 | V 20  | ---        | 983.786 | 940.509 | V 20  | ---        | 983.786 | 940.509 | ---        | 3  |
| N 21  | ---        | 2933.555 | 490.319  | N 21  | ---        | ---      | 1467.281 | N 21  | ---        | 828.644 | 978.523 | N 21  | ---        | 828.644 | 978.523 | ---        | 2  |
| K 22  | ---        | ---      | 376.276  | K 22  | ---        | ---      | 188.642  | K 22  | ---        | ---     | 126.097 | ---   | ---        | ---     | 126.097 | ---        | 1  |

Prx1 Cys173 - SO<sub>3</sub>: HGEVCPAGWKPGSDTIKPDVVK  
Precursor mass: 660.76199 Da (+5)

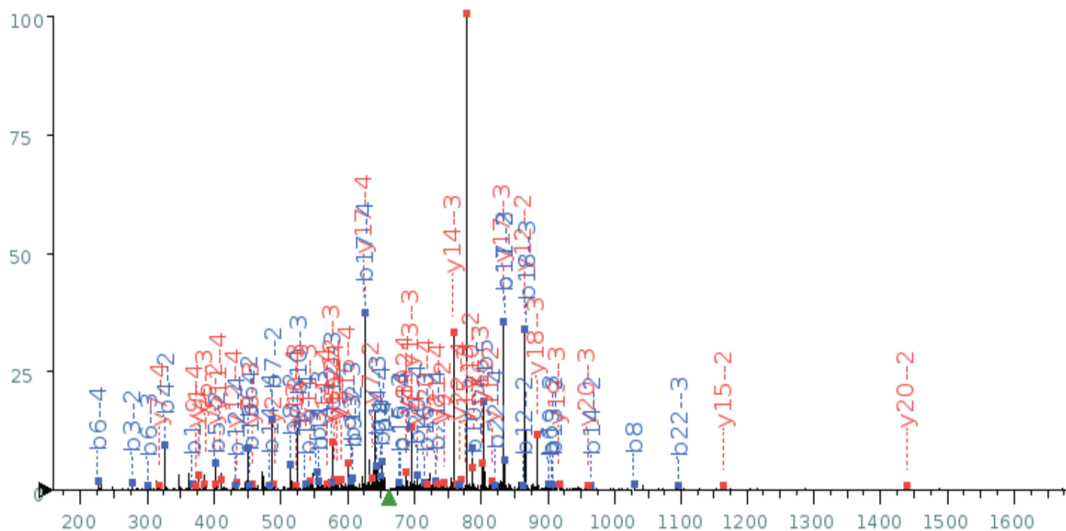

| +1    |            |          |          |            |    |
|-------|------------|----------|----------|------------|----|
| Seq # | b: Δ Error | b        | y        | y: Δ Error | +1 |
| H 1   | 990.362    | 367.229  | ---      | ---        | 22 |
| G 2   | ---        | 424.251  | 2933.565 | ---        | 21 |
| E 3   | 411.141    | 553.293  | 2876.543 | ---        | 20 |
| V 4   | 234.099    | 652.362  | 2747.501 | ---        | 19 |
| C# 5  | 305.341    | 803.356  | 2648.432 | ---        | 18 |
| P 6   | 593.365    | 900.408  | 2497.438 | ---        | 17 |
| A 7   | ---        | 971.445  | 2400.385 | ---        | 16 |
| G 8   | 359.919    | 1028.467 | 2329.348 | ---        | 15 |
| W 9   | ---        | 1214.546 | 2272.327 | ---        | 14 |
| K 10  | ---        | 1571.804 | 2086.248 | ---        | 13 |
| P 11  | ---        | 1668.857 | 1728.990 | ---        | 12 |
| G 12  | ---        | 1725.878 | 1631.937 | ---        | 11 |
| S 13  | ---        | 1812.910 | 1574.915 | ---        | 10 |
| D 14  | ---        | 1927.937 | 1487.883 | ---        | 9  |
| T 15  | ---        | 2028.985 | 1372.856 | ---        | 8  |
| I 16  | ---        | 2142.069 | 1271.809 | ---        | 7  |
| K 17  | ---        | 2499.327 | 1158.725 | ---        | 6  |
| P 18  | ---        | 2596.380 | 801.467  | 20.196     | 5  |
| D 19  | ---        | 2711.407 | 704.414  | -1091.493  | 4  |
| V 20  | ---        | 2810.475 | 589.387  | 182.446    | 3  |
| N 21  | ---        | 2924.518 | 490.319  | -1333.967  | 2  |
| K 22  | ---        | ---      | 376.276  | 650.250    | 1  |

| +2    |            |          |          |            |    |
|-------|------------|----------|----------|------------|----|
| Seq # | b: Δ Error | b        | y        | y: Δ Error | +1 |
| H 1   | ---        | 184.118  | ---      | ---        | 22 |
| G 2   | ---        | 212.629  | 1467.286 | ---        | 21 |
| E 3   | 1538.909   | 277.150  | 1438.775 | 50.788     | 20 |
| V 4   | 685.436    | 326.684  | 1374.254 | ---        | 19 |
| C# 5  | 658.810    | 402.181  | 1324.720 | ---        | 18 |
| P 6   | 685.806    | 450.708  | 1249.223 | ---        | 17 |
| A 7   | 719.726    | 486.226  | 1200.696 | ---        | 16 |
| G 8   | 394.685    | 514.737  | 1165.178 | -70.031    | 15 |
| W 9   | 537.995    | 607.777  | 1136.667 | ---        | 14 |
| K 10  | 646.986    | 786.406  | 1043.627 | ---        | 13 |
| P 11  | -407.254   | 834.932  | 864.998  | 644.682    | 12 |
| G 12  | -365.210   | 863.443  | 816.472  | 497.071    | 11 |
| S 13  | -50.541    | 906.959  | 787.961  | -254.249   | 10 |
| D 14  | 184.456    | 964.472  | 744.445  | 1191.158   | 9  |
| T 15  | ---        | 1014.996 | 686.932  | -119.735   | 8  |
| I 16  | ---        | 1071.538 | 636.408  | 318.417    | 7  |
| K 17  | ---        | 1250.167 | 579.866  | 678.956    | 6  |
| P 18  | ---        | 1298.693 | 401.237  | 1037.048   | 5  |
| D 19  | ---        | 1356.207 | 352.711  | ---        | 4  |
| V 20  | ---        | 1405.741 | 295.197  | ---        | 3  |
| N 21  | ---        | 1462.763 | 245.663  | ---        | 2  |
| K 22  | ---        | ---      | 188.642  | ---        | 1  |

| +3    |            |         |         |            |    |
|-------|------------|---------|---------|------------|----|
| Seq # | b: Δ Error | b       | y       | y: Δ Error | +1 |
| H 1   | ---        | 123.081 | ---     | ---        | 22 |
| G 2   | ---        | 142.088 | 978.526 | ---        | 21 |
| E 3   | ---        | 185.103 | 959.519 | 76.779     | 20 |
| V 4   | ---        | 218.125 | 916.505 | 688.837    | 19 |
| C# 5  | ---        | 268.457 | 883.482 | 875.804    | 18 |
| P 6   | 2354.745   | 300.808 | 833.151 | 797.331    | 17 |
| A 7   | ---        | 324.487 | 800.800 | 852.152    | 16 |
| G 8   | ---        | 343.494 | 777.121 | 842.212    | 15 |
| W 9   | ---        | 405.520 | 758.114 | 880.446    | 14 |
| K 10  | 738.465    | 524.606 | 696.087 | 634.315    | 13 |
| P 11  | 150.376    | 556.957 | 577.001 | 736.025    | 12 |
| G 12  | 343.988    | 575.964 | 544.650 | -144.503   | 11 |
| S 13  | -215.820   | 604.975 | 525.643 | -1237.002  | 10 |
| D 14  | 263.950    | 643.317 | 496.633 | ---        | 9  |
| T 15  | 1255.435   | 677.000 | 458.290 | 24.947     | 8  |
| I 16  | 379.629    | 714.695 | 424.608 | ---        | 7  |
| K 17  | 42.275     | 833.780 | 386.913 | -1307.927  | 6  |
| P 18  | -664.254   | 866.131 | 267.827 | ---        | 5  |
| D 19  | 581.321    | 904.474 | 235.476 | ---        | 4  |
| V 20  | ---        | 937.497 | 197.134 | ---        | 3  |
| N 21  | ---        | 975.511 | 164.111 | ---        | 2  |
| K 22  | ---        | ---     | 126.097 | ---        | 1  |

| +4    |            |         |         |            |    |
|-------|------------|---------|---------|------------|----|
| Seq # | b: Δ Error | b       | y       | y: Δ Error | +1 |
| H 1   | ---        | 92.563  | ---     | ---        | 22 |
| G 2   | ---        | 106.818 | 734.147 | -813.404   | 21 |
| E 3   | ---        | 139.079 | 719.891 | 290.981    | 20 |
| V 4   | ---        | 163.846 | 687.631 | -1137.041  | 19 |
| C# 5  | ---        | 201.594 | 662.863 | ---        | 18 |
| P 6   | 1472.047   | 225.858 | 625.115 | 866.457    | 17 |
| A 7   | ---        | 243.617 | 600.852 | 1095.768   | 16 |
| G 8   | ---        | 257.872 | 583.093 | 835.443    | 15 |
| W 9   | ---        | 304.392 | 568.837 | 654.615    | 14 |
| K 10  | ---        | 393.706 | 522.317 | -33.098    | 13 |
| P 11  | ---        | 417.970 | 433.003 | 1056.223   | 12 |
| G 12  | 625.894    | 432.225 | 408.740 | 2385.029   | 11 |
| S 13  | -437.886   | 453.983 | 394.484 | ---        | 10 |
| D 14  | 1215.841   | 482.740 | 372.726 | -2342.508  | 9  |
| T 15  | ---        | 508.002 | 343.970 | ---        | 8  |
| I 16  | 461.862    | 536.273 | 318.708 | -963.644   | 7  |
| K 17  | 111.757    | 625.587 | 290.437 | ---        | 6  |
| P 18  | 1015.622   | 649.850 | 201.122 | ---        | 5  |
| D 19  | -1115.703  | 678.607 | 176.859 | ---        | 4  |
| V 20  | 386.249    | 703.374 | 148.102 | ---        | 3  |
| N 21  | 963.616    | 731.885 | 123.335 | ---        | 2  |
| K 22  | ---        | ---     | 94.824  | ---        | 1  |

# Prx2 Cys172 - unmodified: LVQAFQYTDEHGEVCPAGWKPGSDTIKPNVDDSK

Precursor mass: 941.89284 Da (+5)

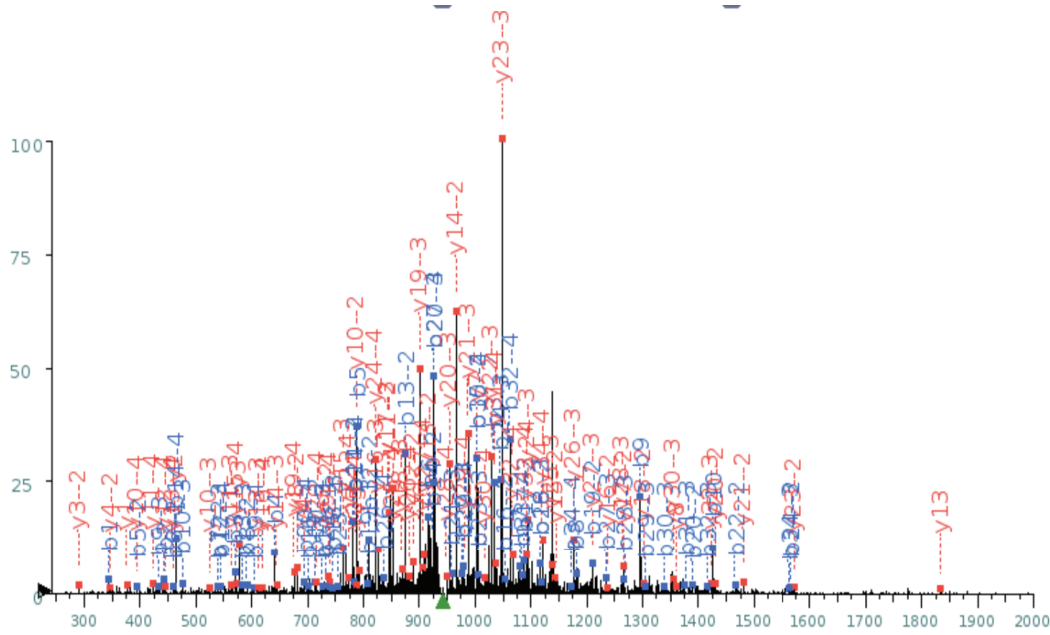

| Seq # | b: Δ Error | b               | y               | y: Δ Error | +1 |
|-------|------------|-----------------|-----------------|------------|----|
| L 1   | 593.723    | <b>343.254</b>  | ---             | ---        | 34 |
| V 2   | 390.093    | <b>442.323</b>  | 4363.191        | ---        | 33 |
| Q 3   | 397.095    | <b>570.381</b>  | 4264.122        | ---        | 32 |
| A 4   | 255.079    | <b>641.418</b>  | 4136.064        | ---        | 31 |
| F 5   | -165.494   | <b>788.487</b>  | 4065.027        | ---        | 30 |
| Q 6   | 289.107    | <b>916.545</b>  | 3917.958        | ---        | 29 |
| Y 7   | 457.444    | <b>1079.609</b> | 3789.900        | ---        | 28 |
| T 8   | 401.823    | <b>1180.656</b> | 3626.836        | ---        | 27 |
| D 9   | 274.580    | <b>1295.683</b> | 3525.789        | ---        | 26 |
| E 10  | 282.778    | <b>1424.726</b> | 3410.762        | ---        | 25 |
| H 11  | ---        | 1561.785        | 3281.719        | ---        | 24 |
| G 12  | ---        | 1618.806        | 3144.660        | ---        | 23 |
| E 13  | ---        | 1747.849        | 3087.639        | ---        | 22 |
| V 14  | ---        | 1846.917        | 2958.596        | ---        | 21 |
| C 15  | ---        | 2006.948        | 2859.528        | ---        | 20 |
| P 16  | ---        | 2104.001        | 2699.497        | ---        | 19 |
| A 17  | ---        | 2175.038        | 2602.444        | ---        | 18 |
| G 18  | ---        | 2232.059        | 2531.407        | ---        | 17 |
| W 19  | ---        | 2418.139        | 2474.386        | ---        | 16 |
| K 20  | ---        | 2775.396        | 2288.306        | ---        | 15 |
| P 21  | ---        | 2872.449        | 1931.049        | ---        | 14 |
| G 22  | ---        | 2929.471        | <b>1833.996</b> | -6.112     | 13 |
| S 23  | ---        | 3016.503        | 1776.974        | ---        | 12 |
| D 24  | ---        | 3131.530        | 1689.942        | ---        | 11 |
| T 25  | ---        | 3232.577        | 1574.915        | ---        | 10 |
| I 26  | ---        | 3345.661        | 1473.868        | ---        | 9  |
| K 27  | ---        | 3702.919        | <b>1360.784</b> | 298.930    | 8  |
| P 28  | ---        | 3799.972        | <b>1002.526</b> | 328.325    | 7  |
| N 29  | ---        | 3914.015        | <b>906.473</b>  | 831.841    | 6  |
| V 30  | ---        | 4013.083        | <b>792.430</b>  | 220.299    | 5  |
| D 31  | ---        | 4128.110        | <b>693.362</b>  | 274.810    | 4  |
| D 32  | ---        | 4243.137        | <b>578.335</b>  | 365.669    | 3  |
| S 33  | ---        | 4330.169        | <b>463.308</b>  | 266.313    | 2  |
| K 34  | ---        | ---             | <b>376.276</b>  | 413.029    | 1  |

| Seq # | b: Δ Error | b               | y               | y: Δ Error | +1 |
|-------|------------|-----------------|-----------------|------------|----|
| L 1   | ---        | 172.131         | ---             | ---        | 34 |
| V 2   | ---        | 221.665         | 2182.099        | ---        | 33 |
| Q 3   | ---        | 285.694         | 2132.565        | ---        | 32 |
| A 4   | ---        | 321.213         | 2068.536        | ---        | 31 |
| F 5   | 1375.385   | <b>394.747</b>  | 2033.017        | ---        | 30 |
| Q 6   | 654.022    | <b>458.776</b>  | 1959.483        | ---        | 29 |
| Y 7   | -1576.523  | <b>540.308</b>  | 1895.453        | ---        | 28 |
| T 8   | 1244.022   | <b>590.832</b>  | 1813.922        | ---        | 27 |
| D 9   | ---        | 648.345         | 1763.398        | ---        | 26 |
| E 10  | -565.945   | <b>712.867</b>  | 1705.885        | ---        | 25 |
| H 11  | 364.730    | <b>781.396</b>  | 1641.363        | ---        | 24 |
| G 12  | 52.319     | <b>809.907</b>  | <b>1572.834</b> | -470.955   | 23 |
| E 13  | 497.662    | <b>874.428</b>  | 1544.323        | ---        | 22 |
| V 14  | 549.428    | <b>923.962</b>  | <b>1479.802</b> | 645.747    | 21 |
| C 15  | -121.793   | <b>1003.978</b> | <b>1430.268</b> | 613.392    | 20 |
| P 16  | 638.334    | <b>1052.504</b> | 1350.252        | ---        | 19 |
| A 17  | 310.378    | <b>1088.023</b> | <b>1301.726</b> | 650.851    | 18 |
| G 18  | -290.314   | <b>1116.533</b> | <b>1266.207</b> | 685.561    | 17 |
| W 19  | 566.195    | <b>1209.573</b> | <b>1237.697</b> | 307.617    | 16 |
| K 20  | 575.827    | <b>1388.202</b> | <b>1144.657</b> | -685.033   | 15 |
| P 21  | ---        | 1436.728        | <b>966.028</b>  | 500.484    | 14 |
| G 22  | 245.967    | <b>1465.239</b> | <b>917.502</b>  | -753.839   | 13 |
| S 23  | ---        | 1508.755        | <b>888.991</b>  | -675.049   | 12 |
| D 24  | -286.221   | <b>1566.268</b> | <b>845.475</b>  | -414.706   | 11 |
| T 25  | ---        | 1616.792        | <b>787.961</b>  | 501.028    | 10 |
| I 26  | ---        | 1673.334        | <b>737.437</b>  | 598.298    | 9  |
| K 27  | ---        | 1851.963        | <b>680.895</b>  | 470.451    | 8  |
| P 28  | ---        | 1900.490        | 502.267         | ---        | 7  |
| N 29  | ---        | 1957.511        | 453.740         | ---        | 6  |
| V 30  | ---        | 2007.045        | 396.719         | ---        | 5  |
| D 31  | ---        | 2064.559        | <b>347.184</b>  | 438.034    | 4  |
| D 32  | ---        | 2122.072        | <b>289.671</b>  | 3282.294   | 3  |
| S 33  | ---        | 2165.588        | 232.158         | ---        | 2  |
| K 34  | ---        | ---             | 188.642         | ---        | 1  |

| Seq # | b: Δ Error | b               | y               | y: Δ Error | +1 |
|-------|------------|-----------------|-----------------|------------|----|
| L 1   | ---        | 115.090         | ---             | ---        | 34 |
| V 2   | ---        | 148.112         | 1455.068        | ---        | 33 |
| Q 3   | ---        | 190.799         | <b>1422.046</b> | -55.625    | 32 |
| A 4   | ---        | 214.478         | 1379.359        | ---        | 31 |
| F 5   | ---        | 263.500         | <b>1355.680</b> | -502.425   | 30 |
| Q 6   | ---        | 306.187         | 1306.658        | ---        | 29 |
| Y 7   | ---        | 360.541         | <b>1263.971</b> | 784.274    | 28 |
| T 8   | ---        | 394.224         | <b>1209.617</b> | 529.803    | 27 |
| D 9   | 1788.045   | <b>432.566</b>  | <b>1175.934</b> | 664.259    | 26 |
| E 10  | -228.527   | <b>475.580</b>  | <b>1137.592</b> | 440.347    | 25 |
| H 11  | ---        | 521.266         | <b>1094.578</b> | 706.752    | 24 |
| G 12  | -1512.804  | <b>540.274</b>  | <b>1048.892</b> | 696.397    | 23 |
| E 13  | 449.384    | <b>583.288</b>  | <b>1029.884</b> | 590.702    | 22 |
| V 14  | ---        | 616.311         | <b>986.870</b>  | 598.619    | 21 |
| C 15  | ---        | 669.654         | <b>953.847</b>  | 672.796    | 20 |
| A 16  | -665.419   | <b>702.005</b>  | <b>900.504</b>  | 642.344    | 19 |
| P 17  | 1336.633   | <b>725.684</b>  | <b>868.153</b>  | 1031.753   | 18 |
| G 18  | 1183.261   | <b>744.691</b>  | <b>844.474</b>  | 769.579    | 17 |
| W 19  | -341.115   | <b>806.718</b>  | <b>825.467</b>  | 408.072    | 16 |
| K 20  | 606.519    | <b>925.804</b>  | <b>763.440</b>  | 865.032    | 15 |
| P 21  | 658.104    | <b>958.155</b>  | <b>644.354</b>  | 266.840    | 14 |
| G 22  | -680.935   | <b>977.162</b>  | <b>612.003</b>  | -61.507    | 13 |
| S 23  | -315.969   | <b>1006.172</b> | 592.996         | ---        | 12 |
| D 24  | 679.148    | <b>1044.515</b> | <b>563.986</b>  | -781.377   | 11 |
| T 25  | ---        | 1078.197        | <b>525.643</b>  | -103.130   | 10 |
| I 26  | 284.206    | <b>1115.892</b> | 491.961         | ---        | 9  |
| K 27  | 728.005    | <b>1234.978</b> | 454.266         | ---        | 8  |
| P 28  | -199.636   | <b>1267.329</b> | 335.180         | ---        | 7  |
| N 29  | -271.215   | <b>1305.343</b> | 302.029         | ---        | 6  |
| V 30  | -493.703   | <b>1338.366</b> | 264.815         | ---        | 5  |
| D 31  | -575.031   | <b>1376.708</b> | 231.792         | ---        | 4  |
| D 32  | -304.845   | <b>1415.051</b> | 193.450         | ---        | 3  |
| S 33  | ---        | 1444.061        | 155.107         | ---        | 2  |
| K 34  | ---        | ---             | 126.097         | ---        | 1  |

| Seq # | b: Δ Error | b               | y               | y: Δ Error | +1 |
|-------|------------|-----------------|-----------------|------------|----|
| L 1   | ---        | 86.569          | ---             | ---        | 34 |
| V 2   | ---        | 111.336         | <b>1091.553</b> | 674.172    | 33 |
| Q 3   | ---        | 143.351         | <b>1066.786</b> | 762.953    | 32 |
| A 4   | ---        | 161.110         | <b>1034.771</b> | 848.014    | 31 |
| F 5   | ---        | 197.877         | <b>1017.012</b> | 49.821     | 30 |
| Q 6   | ---        | 229.892         | <b>980.245</b>  | -998.396   | 29 |
| Y 7   | ---        | 270.658         | <b>948.230</b>  | 400.743    | 28 |
| T 8   | ---        | 295.920         | <b>907.465</b>  | 560.474    | 27 |
| D 9   | ---        | 324.676         | <b>882.203</b>  | 518.759    | 26 |
| E 10  | ---        | 356.937         | <b>853.446</b>  | 889.969    | 25 |
| H 11  | ---        | 391.202         | <b>821.185</b>  | 806.516    | 24 |
| G 12  | ---        | 405.457         | <b>786.921</b>  | -43.889    | 23 |
| E 13  | ---        | 437.718         | <b>772.665</b>  | 131.512    | 22 |
| V 14  | 2042.164   | <b>462.485</b>  | <b>740.405</b>  | 764.208    | 21 |
| C 15  | ---        | 502.492         | <b>715.637</b>  | -1356.826  | 20 |
| P 16  | ---        | 526.756         | <b>675.630</b>  | 1161.870   | 19 |
| A 17  | -1804.924  | <b>544.515</b>  | 651.367         | ---        | 18 |
| G 18  | ---        | 558.770         | 633.607         | ---        | 17 |
| W 19  | 590.642    | <b>605.290</b>  | <b>619.352</b>  | -611.625   | 16 |
| K 20  | -161.307   | <b>694.605</b>  | <b>572.832</b>  | -528.530   | 15 |
| P 21  | ---        | 718.868         | 483.518         | ---        | 14 |
| G 22  | 60.732     | <b>733.123</b>  | <b>459.254</b>  | -387.399   | 13 |
| S 23  | 361.072    | <b>754.881</b>  | <b>444.999</b>  | -1229.541  | 12 |
| D 24  | -137.647   | <b>783.638</b>  | <b>423.241</b>  | 534.842    | 11 |
| T 25  | ---        | 808.900         | <b>394.484</b>  | 2040.030   | 10 |
| I 26  | 229.192    | <b>837.171</b>  | 369.222         | ---        | 9  |
| K 27  | -129.268   | <b>926.485</b>  | 340.951         | ---        | 8  |
| P 28  | ---        | 950.748         | 251.637         | ---        | 7  |
| N 29  | 8.294      | <b>979.259</b>  | 227.374         | ---        | 6  |
| V 30  | -170.312   | <b>1004.026</b> | 198.863         | ---        | 5  |
| D 31  | 734.783    | <b>1032.783</b> | 174.096         | ---        | 4  |
| D 32  | 684.096    | <b>1061.540</b> | 145.339         | ---        | 3  |
| S 33  | 486.161    | <b>1083.298</b> | 116.582         | ---        | 2  |
| K 34  | ---        | ---             | 94.824          | ---        | 1  |

Prx4 Cys54 - unmodified: ENECHFYGAGGQVYPGEASR  
 Precursor mass: 800.70152 Da (+3)

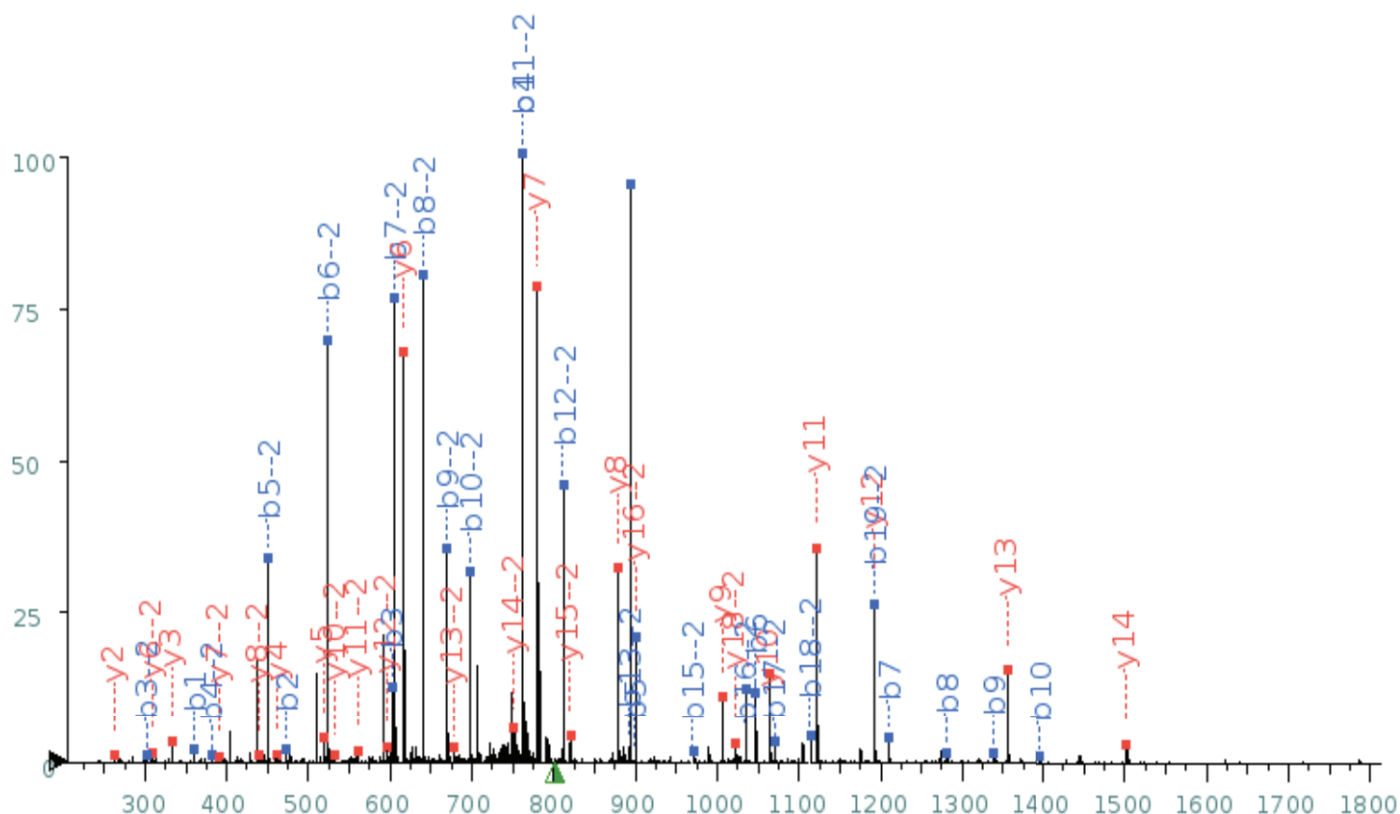

| Seq # | b: $\Delta$ Error | b        | +1       | y       | y: $\Delta$ Error | +1 |
|-------|-------------------|----------|----------|---------|-------------------|----|
| E 1   | 364.411           | 359.213  | ---      | ---     | ---               | 19 |
| N 2   | 302.101           | 473.256  | 2041.882 | ---     | ---               | 18 |
| E 3   | 330.685           | 602.298  | 1927.839 | ---     | ---               | 17 |
| C 4   | 394.253           | 762.329  | 1798.797 | ---     | ---               | 16 |
| H 5   | 420.841           | 899.388  | 1638.766 | ---     | ---               | 15 |
| F 6   | 299.007           | 1046.456 | 1501.707 | 256.974 | 14                |    |
| Y 7   | 275.170           | 1209.520 | 1354.639 | 367.214 | 13                |    |
| A 8   | 400.323           | 1280.557 | 1191.575 | 324.371 | 12                |    |
| G 9   | 342.150           | 1337.578 | 1120.538 | 305.847 | 11                |    |
| G 10  | 449.840           | 1394.600 | 1063.517 | 348.947 | 10                |    |
| Q 11  | ---               | 1522.658 | 1006.495 | 356.569 | 9                 |    |
| V 12  | ---               | 1621.727 | 878.437  | 395.180 | 8                 |    |
| Y 13  | ---               | 1784.790 | 779.368  | 299.592 | 7                 |    |
| P 14  | ---               | 1881.843 | 616.305  | 351.375 | 6                 |    |
| G 15  | ---               | 1938.864 | 519.252  | 452.077 | 5                 |    |
| E 16  | ---               | 2067.907 | 462.231  | 108.847 | 4                 |    |
| A 17  | ---               | 2138.944 | 333.188  | 333.974 | 3                 |    |
| S 18  | ---               | 2225.976 | 262.151  | 795.354 | 2                 |    |
| R 19  | ---               | ---      | 175.119  | ---     | ---               | 1  |

| Seq # | b: $\Delta$ Error | b        | +2       | y        | y: $\Delta$ Error | +1 |
|-------|-------------------|----------|----------|----------|-------------------|----|
| E 1   | ---               | 180.110  | ---      | ---      | ---               | 19 |
| N 2   | ---               | 237.132  | 1021.445 | 197.342  | 18                |    |
| E 3   | 1848.363          | 301.653  | 964.423  | ---      | 17                |    |
| C 4   | 1918.269          | 381.668  | 899.902  | -150.469 | 16                |    |
| H 5   | 304.863           | 450.198  | 819.887  | 849.116  | 15                |    |
| F 6   | 775.247           | 523.732  | 751.357  | 563.562  | 14                |    |
| Y 7   | 654.192           | 605.263  | 677.823  | 790.333  | 13                |    |
| A 8   | 717.925           | 640.782  | 596.291  | -771.275 | 12                |    |
| G 9   | 780.168           | 669.293  | 560.773  | 423.514  | 11                |    |
| G 10  | 779.684           | 697.803  | 532.262  | 594.400  | 10                |    |
| Q 11  | 1044.910          | 761.833  | 503.751  | ---      | 9                 |    |
| V 12  | 984.826           | 811.367  | 439.722  | 1160.620 | 8                 |    |
| Y 13  | 717.009           | 892.899  | 390.188  | 2058.179 | 7                 |    |
| P 14  | ---               | 941.425  | 308.656  | 885.809  | 6                 |    |
| G 15  | 967.369           | 969.936  | 260.130  | ---      | 5                 |    |
| E 16  | 697.970           | 1034.457 | 231.619  | ---      | 4                 |    |
| A 17  | 592.434           | 1069.976 | 167.098  | ---      | 3                 |    |
| S 18  | 692.450           | 1113.492 | 131.579  | ---      | 2                 |    |
| R 19  | ---               | ---      | 88.063   | ---      | ---               | 1  |

PRX4 Cys248 - unmodified: HGEVCPAGWKPGSETIIPDPAGK  
 Precursor mass: 773.42007 Da (+4)

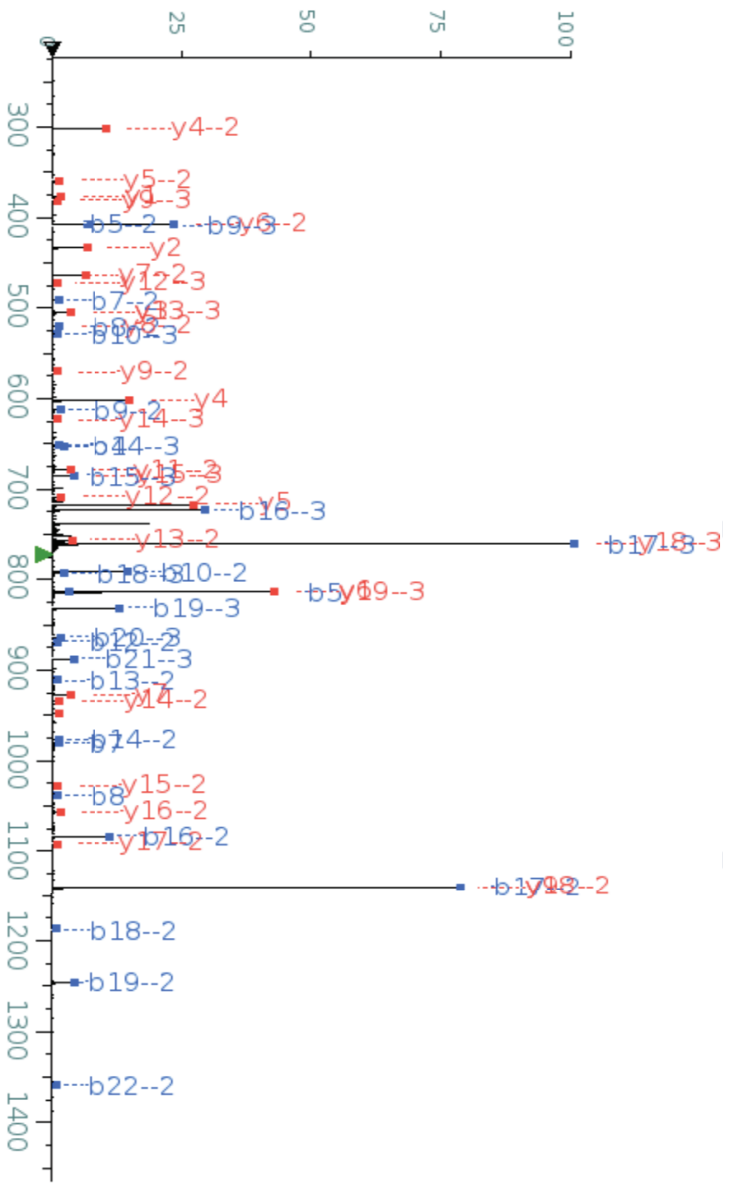

| +1    |            |          |          |            | +2    |            |          |          |            | +3    |            |         |         |            |
|-------|------------|----------|----------|------------|-------|------------|----------|----------|------------|-------|------------|---------|---------|------------|
| Seq # | b: Δ Error | b        | Y        | Y: Δ Error | Seq # | b: Δ Error | b        | Y        | Y: Δ Error | Seq # | b: Δ Error | b       | Y       | Y: Δ Error |
| H 1   | ---        | 367.229  | ---      | ---        | H 1   | ---        | 184.118  | ---      | ---        | H 1   | ---        | 123.081 | ---     | ---        |
| G 2   | ---        | 424.251  | 2724.443 | ---        | G 2   | ---        | 212.629  | 1362.725 | ---        | G 2   | ---        | 142.088 | 908.819 | ---        |
| E 3   | ---        | 553.293  | 2667.422 | ---        | E 3   | ---        | 277.150  | 1334.214 | ---        | E 3   | ---        | 185.103 | 889.812 | ---        |
| V 4   | 501.017    | 652.362  | 2538.379 | ---        | V 4   | ---        | 326.684  | 1269.693 | ---        | V 4   | ---        | 218.125 | 846.798 | ---        |
| C 5   | 413.763    | 812.392  | 2439.311 | ---        | C 5   | ---        | 406.700  | 1220.159 | ---        | C 5   | ---        | 271.469 | 813.775 | -80.007    |
| P 6   | ---        | 909.445  | 2279.280 | ---        | P 6   | ---        | 455.226  | 1140.144 | ---        | P 6   | ---        | 303.820 | 760.432 | 145.905    |
| A 7   | -942.608   | 980.482  | 2182.227 | ---        | A 7   | ---        | 490.745  | 1091.617 | 64.381     | A 7   | ---        | 327.499 | 728.081 | ---        |
| G 8   | 287.317    | 1037.504 | 2111.190 | ---        | G 8   | ---        | 519.255  | 1056.099 | 776.300    | G 8   | ---        | 346.506 | 704.402 | ---        |
| W 9   | ---        | 1223.583 | 2054.169 | ---        | W 9   | ---        | 612.295  | 1027.588 | 680.166    | W 9   | -1316.786  | 408.532 | 685.394 | -119.151   |
| K 10  | ---        | 1580.841 | 1868.089 | ---        | K 10  | ---        | 790.924  | 934.548  | 428.742    | K 10  | 1642.433   | 527.618 | 623.368 | -1413.071  |
| P 11  | ---        | 1677.894 | 1510.831 | ---        | P 11  | ---        | 839.450  | 755.919  | 179.801    | P 11  | ---        | 559.969 | 504.282 | 541.908    |
| G 12  | ---        | 1734.915 | 1413.779 | ---        | G 12  | ---        | 1044.890 | 867.961  | 707.393    | G 12  | ---        | 578.977 | 471.931 | 424.186    |
| S 13  | ---        | 1821.947 | 1356.757 | ---        | S 13  | ---        | 849.998  | 911.477  | 678.882    | S 13  | ---        | 607.987 | 452.924 | ---        |
| E 14  | ---        | 1950.990 | 1269.725 | ---        | E 14  | ---        | 1.706    | 975.998  | 635.366    | E 14  | 1318.166   | 651.001 | 423.913 | ---        |
| T 15  | ---        | 2052.037 | ---      | -408.300   | T 15  | ---        | 1026.522 | 570.845  | -1602.353  | T 15  | 917.520    | 684.684 | 380.899 | 1342.686   |
| I 16  | ---        | 2165.121 | 1039.635 | ---        | I 16  | ---        | 484.639  | 1083.064 | 520.321    | I 16  | 588.418    | 722.379 | 347.216 | ---        |
| I 17  | ---        | 2278.205 | ---      | 926.551    | I 17  | ---        | 535.583  | 1139.606 | 463.779    | I 17  | 616.860    | 760.073 | 309.522 | ---        |
| P 18  | ---        | 2375.258 | ---      | 813.467    | P 18  | ---        | -831.191 | 1188.133 | 407.237    | P 18  | 95.041     | 792.424 | 271.827 | ---        |
| D 19  | ---        | 2490.285 | ---      | 716.414    | D 19  | ---        | 537.935  | 1245.646 | 358.711    | D 19  | 506.717    | 830.767 | 239.476 | ---        |
| P 20  | ---        | 2587.338 | ---      | 601.387    | P 20  | ---        | ---      | 1294.173 | 301.197    | P 20  | 519.912    | 863.117 | 201.134 | ---        |
| A 21  | ---        | 2658.375 | ---      | 504.334    | A 21  | ---        | ---      | 1329.691 | 252.671    | A 21  | 558.539    | 886.797 | 168.783 | ---        |
| G 22  | ---        | 2715.396 | ---      | 433.297    | G 22  | ---        | 213.156  | 1358.202 | 217.152    | G 22  | ---        | 905.804 | 145.104 | ---        |
| K 23  | ---        | ---      | 376.276  | 508.806    | K 23  | ---        | ---      | ---      | 188.642    | K 23  | ---        | ---     | 126.097 | ---        |

Prx5 Cys96 - unmodified: GVLFGVPGAFTPGCSK  
 Precursor mass: 684.71587 Da (+3)

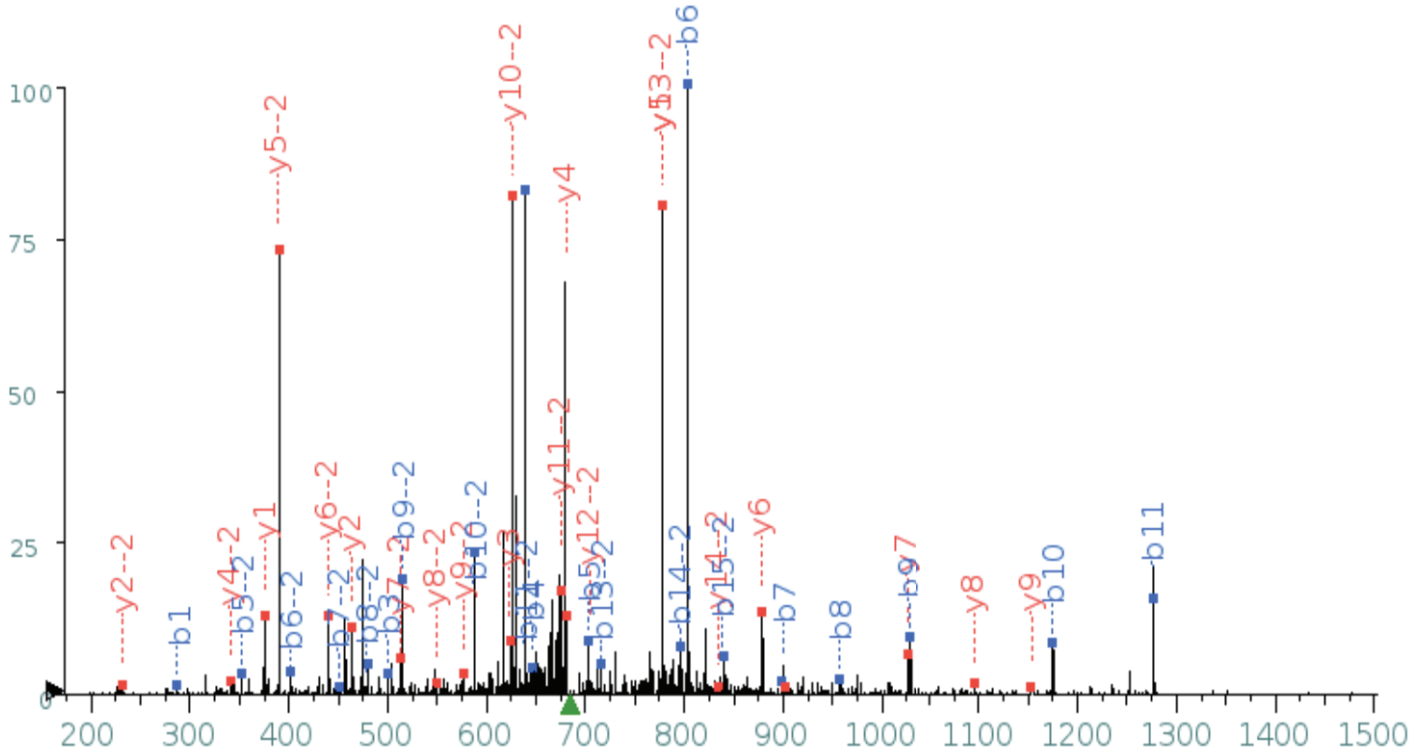

+1

| Seq # | b: $\Delta$ Error | b        | y        | y: $\Delta$ Error | +1 |
|-------|-------------------|----------|----------|-------------------|----|
| G 1   | -2710.282         | 287.192  | ---      | ---               | 16 |
| V 2   | ---               | 386.260  | 1765.951 | ---               | 15 |
| L 3   | 51.267            | 499.344  | 1666.882 | ---               | 14 |
| F 4   | 14.593            | 646.413  | 1553.798 | ---               | 13 |
| G 5   | 326.390           | 703.434  | 1406.730 | ---               | 12 |
| V 6   | 344.263           | 802.502  | 1349.708 | ---               | 11 |
| P 7   | -779.290          | 899.555  | 1250.640 | ---               | 10 |
| G 8   | 288.438           | 956.577  | 1153.587 | -540.307          | 9  |
| A 9   | 299.842           | 1027.614 | 1096.566 | -401.741          | 8  |
| F 10  | 356.980           | 1174.682 | 1025.529 | 356.446           | 7  |
| T 11  | 352.372           | 1275.730 | 878.460  | 378.947           | 6  |
| P 12  | ---               | 1372.783 | 777.413  | 331.464           | 5  |
| G 13  | ---               | 1429.804 | 680.360  | 302.750           | 4  |
| C 14  | ---               | 1589.835 | 623.338  | 432.158           | 3  |
| S 15  | ---               | 1676.867 | 463.308  | 414.352           | 2  |
| K 16  | ---               | ---      | 376.276  | 251.576           | 1  |

+2

| Seq # | b: $\Delta$ Error | b       | y       | y: $\Delta$ Error | +1 |
|-------|-------------------|---------|---------|-------------------|----|
| G 1   | ---               | 144.099 | ---     | ---               | 16 |
| V 2   | ---               | 193.634 | 883.479 | ---               | 15 |
| L 3   | ---               | 250.176 | 833.945 | 608.816           | 14 |
| F 4   | ---               | 323.710 | 777.403 | 344.091           | 13 |
| G 5   | 620.820           | 352.221 | 703.869 | -291.215          | 12 |
| V 6   | 259.323           | 401.755 | 675.358 | 1419.344          | 11 |
| P 7   | -200.021          | 450.281 | 625.824 | 720.981           | 10 |
| G 8   | 910.166           | 478.792 | 577.297 | -1330.195         | 9  |
| A 9   | 633.114           | 514.311 | 548.787 | 1220.241          | 8  |
| F 10  | 1268.612          | 587.845 | 513.268 | 632.585           | 7  |
| T 11  | 771.012           | 638.369 | 439.734 | 1746.862          | 6  |
| P 12  | ---               | 686.895 | 389.210 | 942.535           | 5  |
| G 13  | 576.672           | 715.406 | 340.684 | 1761.529          | 4  |
| C 14  | 783.914           | 795.421 | 312.173 | ---               | 3  |
| S 15  | 780.012           | 838.937 | 232.158 | -3781.415         | 2  |
| K 16  | ---               | ---     | 188.642 | ---               | 1  |



Prx5 Cys96 - SO<sub>3</sub>: GVLFGVPGAFTPGCSK  
 Precursor mass: 681.70372 Da (+3)

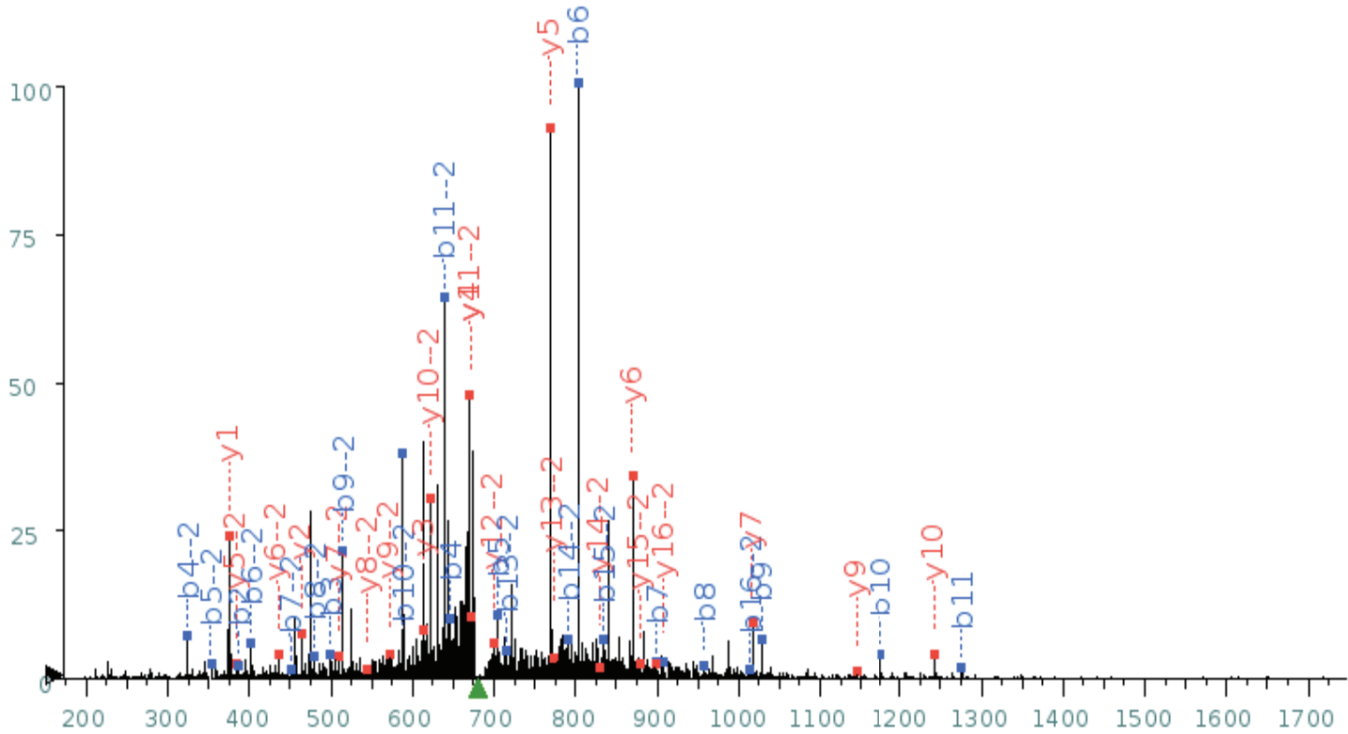

| +1    |            |                 |                 |            |    |  |
|-------|------------|-----------------|-----------------|------------|----|--|
| Seq # | b: Δ Error | b               | y               | y: Δ Error | +1 |  |
| G 1   | ---        | 287.192         | ---             | ---        | 16 |  |
| V 2   | -2010.397  | <b>386.260</b>  | 1756.914        | ---        | 15 |  |
| L 3   | 543.442    | <b>499.344</b>  | 1657.846        | ---        | 14 |  |
| F 4   | -1055.180  | <b>646.413</b>  | 1544.762        | ---        | 13 |  |
| G 5   | 430.086    | <b>703.434</b>  | 1397.693        | ---        | 12 |  |
| V 6   | 221.122    | <b>802.502</b>  | 1340.672        | ---        | 11 |  |
| P 7   | 146.232    | <b>899.555</b>  | <b>1241.603</b> | 234.363    | 10 |  |
| G 8   | 308.078    | <b>956.577</b>  | <b>1144.551</b> | 182.084    | 9  |  |
| A 9   | 190.253    | <b>1027.614</b> | 1087.529        | ---        | 8  |  |
| F 10  | 257.177    | <b>1174.682</b> | <b>1016.492</b> | 294.185    | 7  |  |
| T 11  | 294.424    | <b>1275.730</b> | <b>869.424</b>  | 250.400    | 6  |  |
| P 12  | ---        | 1372.783        | <b>768.376</b>  | 173.844    | 5  |  |
| G 13  | ---        | 1429.804        | <b>671.323</b>  | -510.182   | 4  |  |
| C# 14 | ---        | 1580.798        | <b>614.302</b>  | -1378.782  | 3  |  |
| S 15  | ---        | 1667.830        | <b>463.308</b>  | 235.107    | 2  |  |
| K 16  | ---        | ---             | <b>376.276</b>  | 416.594    | 1  |  |

| +2    |            |                |                |            |    |  |
|-------|------------|----------------|----------------|------------|----|--|
| Seq # | b: Δ Error | b              | y              | y: Δ Error | +1 |  |
| G 1   | ---        | 144.099        | ---            | ---        | 16 |  |
| V 2   | ---        | 193.634        | <b>878.961</b> | -169.054   | 15 |  |
| L 3   | ---        | 250.176        | <b>829.426</b> | -156.004   | 14 |  |
| F 4   | 1650.971   | <b>323.710</b> | <b>772.884</b> | -425.913   | 13 |  |
| G 5   | 2112.889   | <b>352.221</b> | <b>699.350</b> | 441.537    | 12 |  |
| V 6   | 398.240    | <b>401.755</b> | <b>670.840</b> | -1120.597  | 11 |  |
| P 7   | 266.372    | <b>450.281</b> | <b>621.305</b> | 594.836    | 10 |  |
| G 8   | 1249.923   | <b>478.792</b> | <b>572.779</b> | -597.736   | 9  |  |
| A 9   | 704.934    | <b>514.311</b> | <b>544.268</b> | -426.120   | 8  |  |
| F 10  | 622.464    | <b>587.845</b> | <b>508.750</b> | -54.971    | 7  |  |
| T 11  | 623.499    | <b>638.369</b> | <b>435.215</b> | -94.634    | 6  |  |
| P 12  | ---        | 686.895        | <b>384.692</b> | 245.839    | 5  |  |
| G 13  | 502.868    | <b>715.406</b> | 336.165        | ---        | 4  |  |
| C# 14 | -546.447   | <b>790.903</b> | 307.654        | ---        | 3  |  |
| S 15  | 460.507    | <b>834.419</b> | 232.158        | ---        | 2  |  |
| K 16  | ---        | ---            | 188.642        | ---        | 1  |  |

Prx5 Cys199 - unmodified: ALNVEPDGTGLTCSLAPNILSQL  
 Precursor mass: 871.4642 Da (+3)

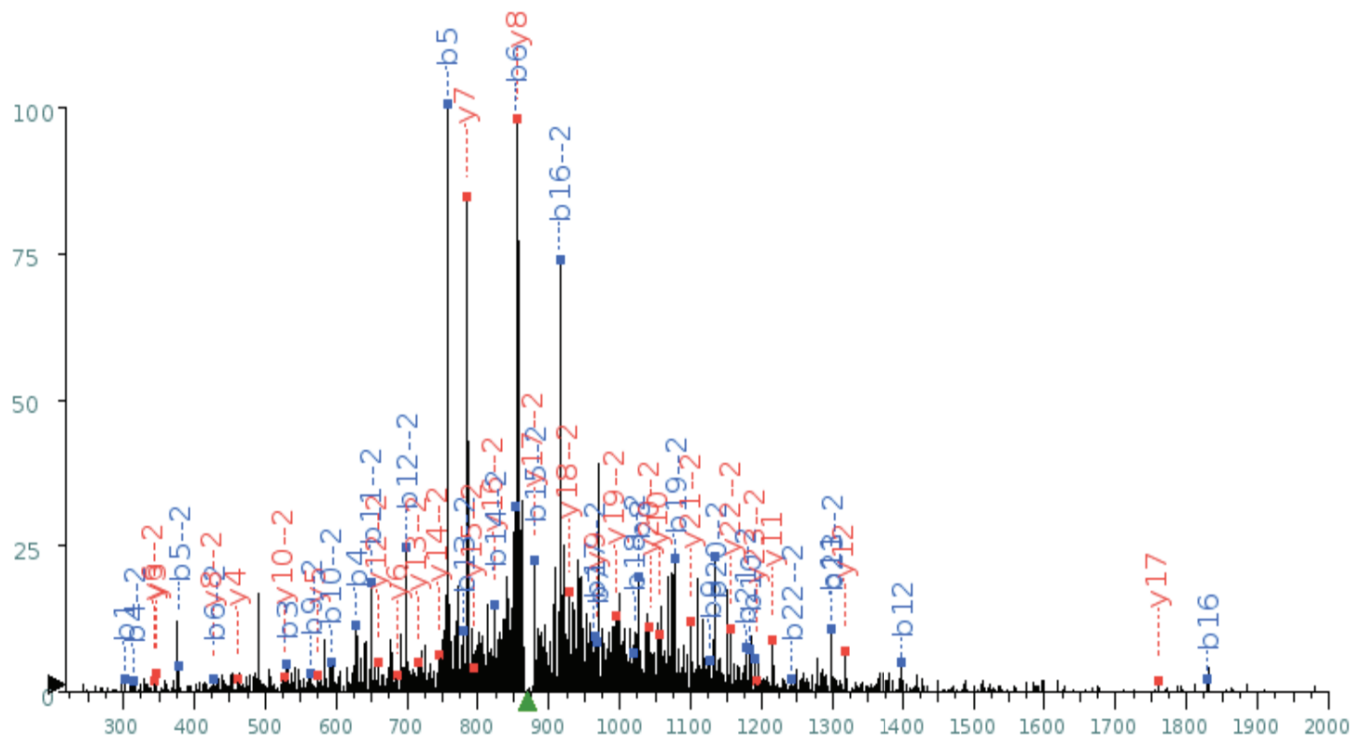

| +1    |                   |          |          |                   |    |  |
|-------|-------------------|----------|----------|-------------------|----|--|
| Seq # | b: $\Delta$ Error | b        | y        | y: $\Delta$ Error | +1 |  |
| A 1   | 364.051           | 301.207  | ---      | ---               | 23 |  |
| L 2   | ---               | 414.291  | 2312.180 | ---               | 22 |  |
| N 3   | 1883.711          | 528.334  | 2199.096 | ---               | 21 |  |
| V 4   | 178.745           | 627.403  | 2085.053 | ---               | 20 |  |
| E 5   | 255.540           | 756.445  | 1985.985 | ---               | 19 |  |
| P 6   | -1143.822         | 853.498  | 1856.942 | ---               | 18 |  |
| D 7   | 247.221           | 968.525  | 1759.889 | -370.713          | 17 |  |
| G 8   | 715.111           | 1025.546 | 1644.863 | ---               | 16 |  |
| T 9   | -815.529          | 1126.594 | 1587.841 | ---               | 15 |  |
| G 10  | 295.569           | 1183.616 | 1486.793 | ---               | 14 |  |
| L 11  | 255.625           | 1296.700 | 1429.772 | ---               | 13 |  |
| T 12  | 313.997           | 1397.747 | 1316.688 | 275.924           | 12 |  |
| C 13  | ---               | 1557.778 | 1215.640 | 212.396           | 11 |  |
| S 14  | ---               | 1644.810 | 1055.610 | 425.682           | 10 |  |
| L 15  | ---               | 1757.894 | 968.578  | 193.048           | 9  |  |
| A 16  | 463.280           | 1828.931 | 855.493  | 264.577           | 8  |  |
| P 17  | ---               | 1925.984 | 784.456  | 255.875           | 7  |  |
| N 18  | ---               | 2040.027 | 687.404  | -146.885          | 6  |  |
| I 19  | ---               | 2153.111 | 573.361  | 525.731           | 5  |  |
| L 20  | ---               | 2266.195 | 460.277  | 1816.384          | 4  |  |
| S 21  | ---               | 2353.227 | 347.193  | 243.488           | 3  |  |
| Q 22  | ---               | 2481.286 | 260.160  | ---               | 2  |  |
| L 23  | ---               | ---      | 132.102  | ---               | 1  |  |

| +2    |                   |          |          |                   |    |  |
|-------|-------------------|----------|----------|-------------------|----|--|
| Seq # | b: $\Delta$ Error | b        | y        | y: $\Delta$ Error | +1 |  |
| A 1   | ---               | 151.107  | ---      | ---               | 23 |  |
| L 2   | ---               | 207.649  | 1156.594 | 466.381           | 22 |  |
| N 3   | ---               | 264.671  | 1100.052 | -536.455          | 21 |  |
| V 4   | -182.970          | 314.205  | 1043.030 | -828.106          | 20 |  |
| E 5   | 828.851           | 378.726  | 993.496  | 135.055           | 19 |  |
| P 6   | 441.811           | 427.253  | 928.975  | 606.030           | 18 |  |
| D 7   | ---               | 484.766  | 880.448  | -497.305          | 17 |  |
| G 8   | ---               | 513.277  | 822.935  | 472.412           | 16 |  |
| T 9   | -378.288          | 563.801  | 794.424  | 552.893           | 15 |  |
| G 10  | 370.222           | 592.311  | 743.900  | 163.160           | 14 |  |
| L 11  | 639.286           | 648.853  | 715.390  | 444.712           | 13 |  |
| T 12  | 377.033           | 699.377  | 658.848  | 463.946           | 12 |  |
| C 13  | 212.399           | 779.393  | 608.324  | ---               | 11 |  |
| S 14  | 504.283           | 822.909  | 528.308  | -1496.138         | 10 |  |
| L 15  | 636.408           | 879.451  | 484.792  | ---               | 9  |  |
| A 16  | 529.360           | 914.969  | 428.250  | -1892.263         | 8  |  |
| P 17  | 983.929           | 963.496  | 392.732  | ---               | 7  |  |
| N 18  | -806.033          | 1020.517 | 344.205  | -2326.655         | 6  |  |
| I 19  | 685.172           | 1077.059 | 287.184  | ---               | 5  |  |
| L 20  | 820.014           | 1133.601 | 230.642  | ---               | 4  |  |
| S 21  | 786.080           | 1177.117 | 174.100  | ---               | 3  |  |
| Q 22  | -210.209          | 1241.146 | 130.584  | ---               | 2  |  |
| L 23  | ---               | ---      | 66.555   | ---               | 1  |  |

Prx5 Cys199 - SO<sub>3</sub>: ALNVEPDGTGLTCSLAPNILSQL  
 Precursor mass: 868.45101 Da (+3)

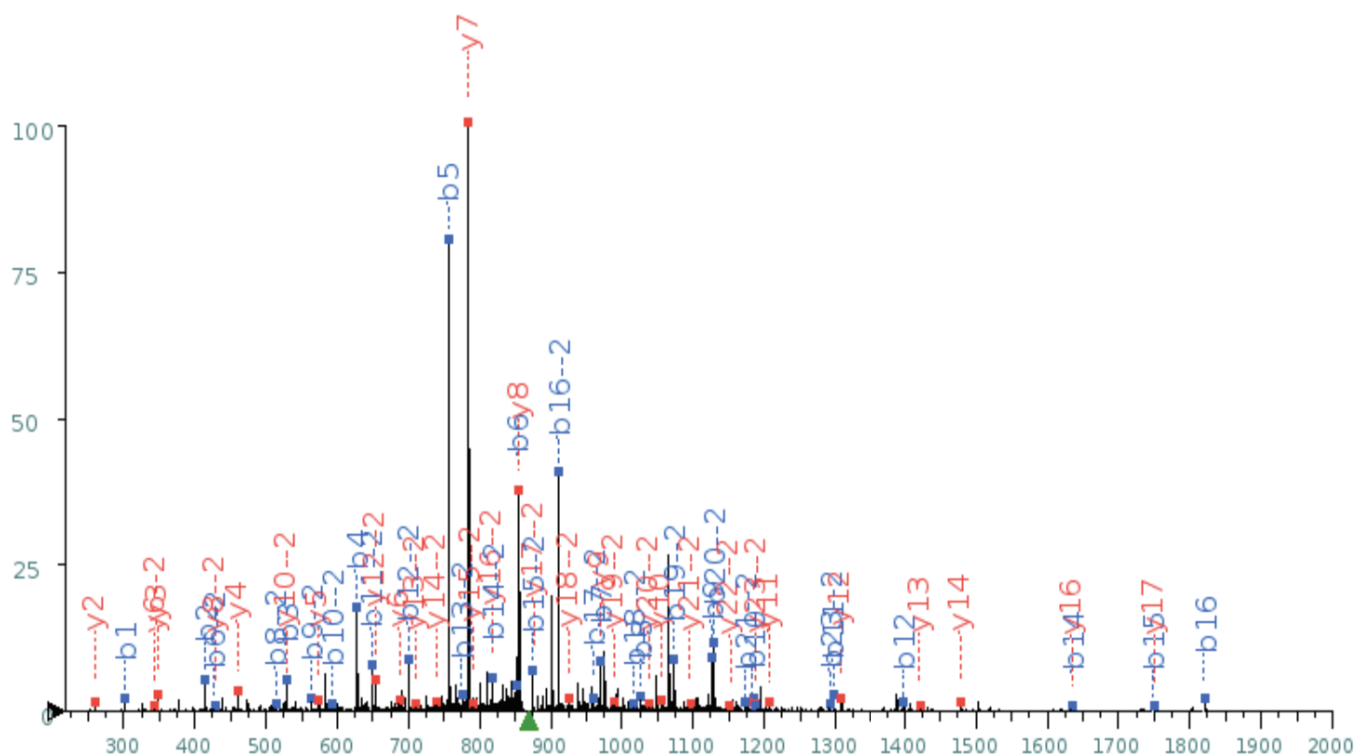

| Seq # | b: Δ Error | b        | y        | y: Δ Error | +1 |
|-------|------------|----------|----------|------------|----|
| A 1   | 768.963    | 301.207  | ---      | ---        | 23 |
| L 2   | 287.264    | 414.291  | 2303.144 | ---        | 22 |
| N 3   | 300.342    | 528.334  | 2190.059 | ---        | 21 |
| V 4   | 239.035    | 627.403  | 2076.017 | ---        | 20 |
| E 5   | 345.855    | 756.445  | 1976.948 | ---        | 19 |
| P 6   | -976.202   | 853.498  | 1847.906 | ---        | 18 |
| D 7   | 319.022    | 968.525  | 1750.853 | 175.680    | 17 |
| G 8   | 319.272    | 1025.546 | 1635.826 | 196.439    | 16 |
| T 9   | 287.873    | 1126.594 | 1578.804 | ---        | 15 |
| G 10  | 366.374    | 1183.616 | 1477.757 | 263.222    | 14 |
| L 11  | 274.631    | 1296.700 | 1420.735 | 383.503    | 13 |
| T 12  | 313.735    | 1397.747 | 1307.651 | 204.381    | 12 |
| C# 13 | ---        | 1548.741 | 1206.603 | 166.537    | 11 |
| S 14  | 228.515    | 1635.773 | 1055.610 | 251.415    | 10 |
| L 15  | 382.373    | 1748.857 | 968.578  | 264.852    | 9  |
| A 16  | 300.822    | 1819.895 | 855.493  | 256.520    | 8  |
| P 17  | ---        | 1916.947 | 784.456  | 300.744    | 7  |
| N 18  | ---        | 2030.990 | 687.404  | 319.542    | 6  |
| I 19  | ---        | 2144.074 | 573.361  | 428.314    | 5  |
| L 20  | ---        | 2257.158 | 460.277  | 116.956    | 4  |
| S 21  | ---        | 2344.190 | 347.193  | 482.134    | 3  |
| Q 22  | ---        | 2472.249 | 260.160  | 543.438    | 2  |
| L 23  | ---        | ---      | 132.102  | ---        | 1  |

| Seq # | b: Δ Error | b        | y        | y: Δ Error | +1 |
|-------|------------|----------|----------|------------|----|
| A 1   | ---        | 151.107  | ---      | ---        | 23 |
| L 2   | ---        | 207.649  | 1152.075 | -145.358   | 22 |
| N 3   | ---        | 264.671  | 1095.533 | 508.139    | 21 |
| V 4   | ---        | 314.205  | 1038.512 | 579.565    | 20 |
| E 5   | ---        | 378.726  | 988.978  | 98.145     | 19 |
| P 6   | 973.193    | 427.253  | 924.456  | 309.377    | 18 |
| D 7   | ---        | 484.766  | 875.930  | -624.614   | 17 |
| G 8   | 89.598     | 513.277  | 818.417  | 543.098    | 16 |
| T 9   | 1170.934   | 563.801  | 789.906  | 1235.482   | 15 |
| G 10  | 437.251    | 592.311  | 739.382  | 199.212    | 14 |
| L 11  | 512.631    | 648.853  | 710.871  | -263.094   | 13 |
| T 12  | 665.162    | 699.377  | 654.329  | -1281.968  | 12 |
| C# 13 | 822.496    | 774.874  | 603.805  | ---        | 11 |
| S 14  | 575.144    | 818.390  | 528.308  | 349.362    | 10 |
| L 15  | 515.093    | 874.932  | 484.792  | ---        | 9  |
| A 16  | 583.401    | 910.451  | 428.250  | -1359.641  | 8  |
| P 17  | -328.819   | 958.977  | 392.732  | ---        | 7  |
| N 18  | 863.999    | 1015.999 | 344.205  | 58.934     | 6  |
| I 19  | 628.770    | 1072.541 | 287.184  | ---        | 5  |
| L 20  | 530.094    | 1129.083 | 230.642  | ---        | 4  |
| S 21  | 685.823    | 1172.599 | 174.100  | ---        | 3  |
| Q 22  | ---        | 1236.628 | 130.584  | ---        | 2  |
| L 23  | ---        | ---      | 66.555   | ---        | 1  |
