# Supplementary material
Source: PubMed Central journal article supplement (PMC7045287)

In the format provided by the authors and unedited.

# Accumulation of succinate controls activation of adipose tissue thermogenesis

Evanna L. Mills<sup>1,2</sup>, Kerry A. Pierce<sup>3</sup>, Mark P. Jedrychowski<sup>1,2</sup>, Ryan Garrity<sup>1</sup>, Sally Winther<sup>1,2</sup>, Sara Vidoni<sup>1,2</sup>, Takeshi Yoneshiro<sup>4</sup>, Jessica B. Spinelli<sup>2</sup>, Gina Z. Lu<sup>1</sup>, Lawrence Kazak<sup>5</sup>, Alexander S. Banks<sup>6</sup>, Marcia C. Haigis<sup>2</sup>, Shingo Kajimura<sup>4</sup>, Michael P. Murphy<sup>7</sup>, Steven P. Gygi<sup>2</sup>, Clary B. Clish<sup>3</sup> & Edward T. Chouchani<sup>1,2\*</sup>

---

<sup>1</sup>Department of Cancer Biology, Dana–Farber Cancer Institute, Boston, MA, USA. <sup>2</sup>Department of Cell Biology, Harvard Medical School, Boston, MA, USA. <sup>3</sup>Broad Institute of Harvard and MIT, Cambridge, MA, USA. <sup>4</sup>Diabetes Center, University of California, San Francisco, San Francisco, CA, USA. <sup>5</sup>Goodman Cancer Research Centre, McGill University, Montreal, Quebec, Canada. <sup>6</sup>Division of Endocrinology, Diabetes, and Hypertension, Brigham and Women’s Hospital and Harvard Medical School, Boston, MA, USA. <sup>7</sup>MRC Mitochondrial Biology Unit, University of Cambridge, Cambridge Biomedical Campus, Cambridge, UK. \*e-mail: [edwardt\\_chouchani@dfci.harvard.edu](mailto:edwardt_chouchani@dfci.harvard.edu)

uncropped blots from Extended Data Fig. 6

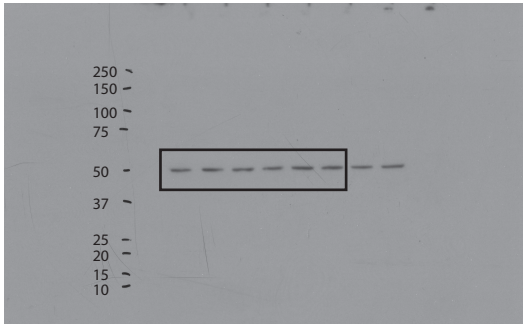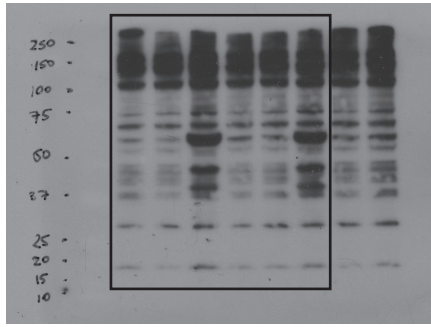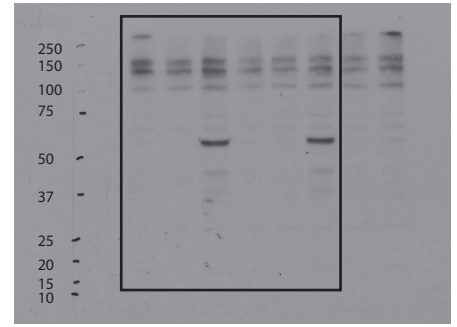

Supplement: NIHMS1065203-supplement-Supplementary_Information.pdf [file NIHMS1065203-supplement-Supplementary_Information.pdf]
